# Supplementary material
Source: MDPI journal article supplement (https://www.mdpi.com/2673-4141/3/4/26)
Supplement: s1 [file s1]

# Metal hydride-based hydrogen storage as potential heat source for the cold start of PEM FC in hydrogen-powered coaches. A comparative study of various materials and thermal management techniques.

Evangelos I. Gkanas, Chongming Wang, Simon Shepherd and Oliver Curnick

Centre for Advanced Low Carbon Propulsion Systems (C-ALPS), Coventry University, Priory Street, CV1 5FB, Coventry, UK

\* Correspondence: [evangelos.gkanas@coventry.ac.uk](mailto:evangelos.gkanas@coventry.ac.uk); [egkanas@gmail.com](mailto:egkanas@gmail.com)

## Supplementary Material

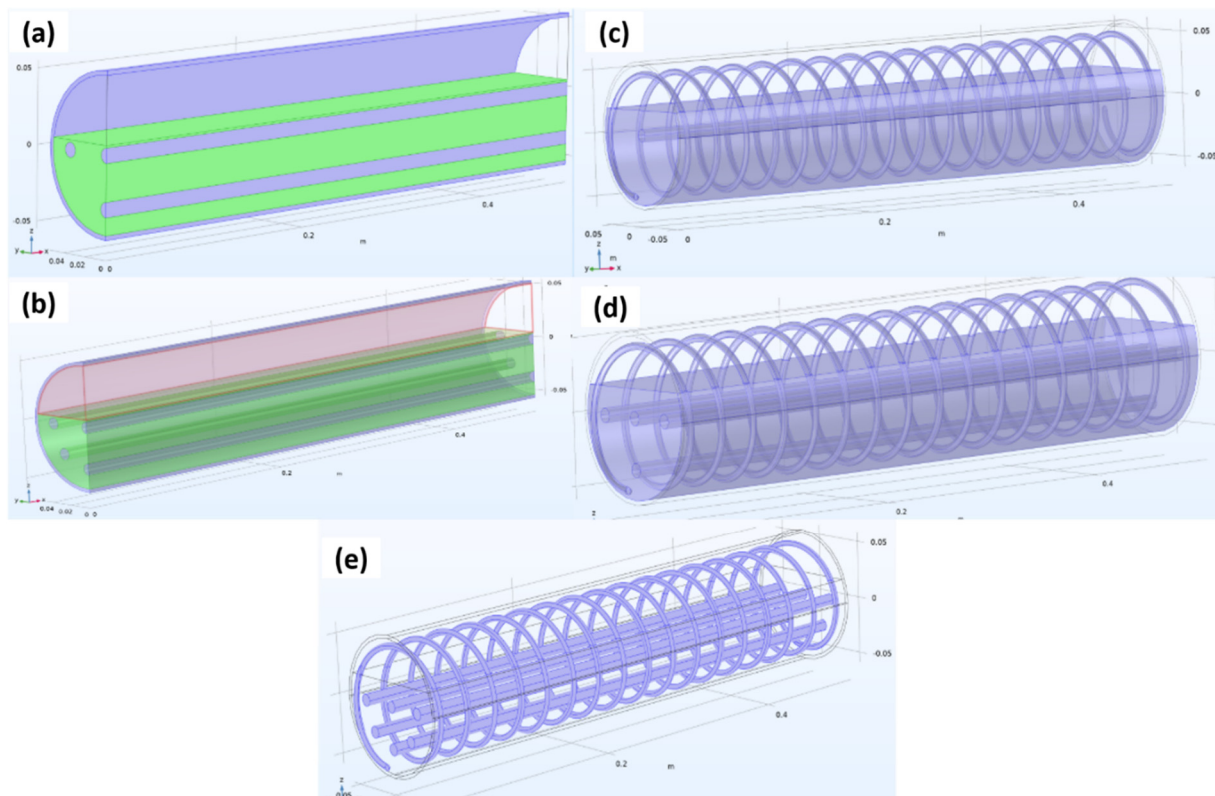

*Figure S1. Extra information about the tank design geometries that have been used in this study*

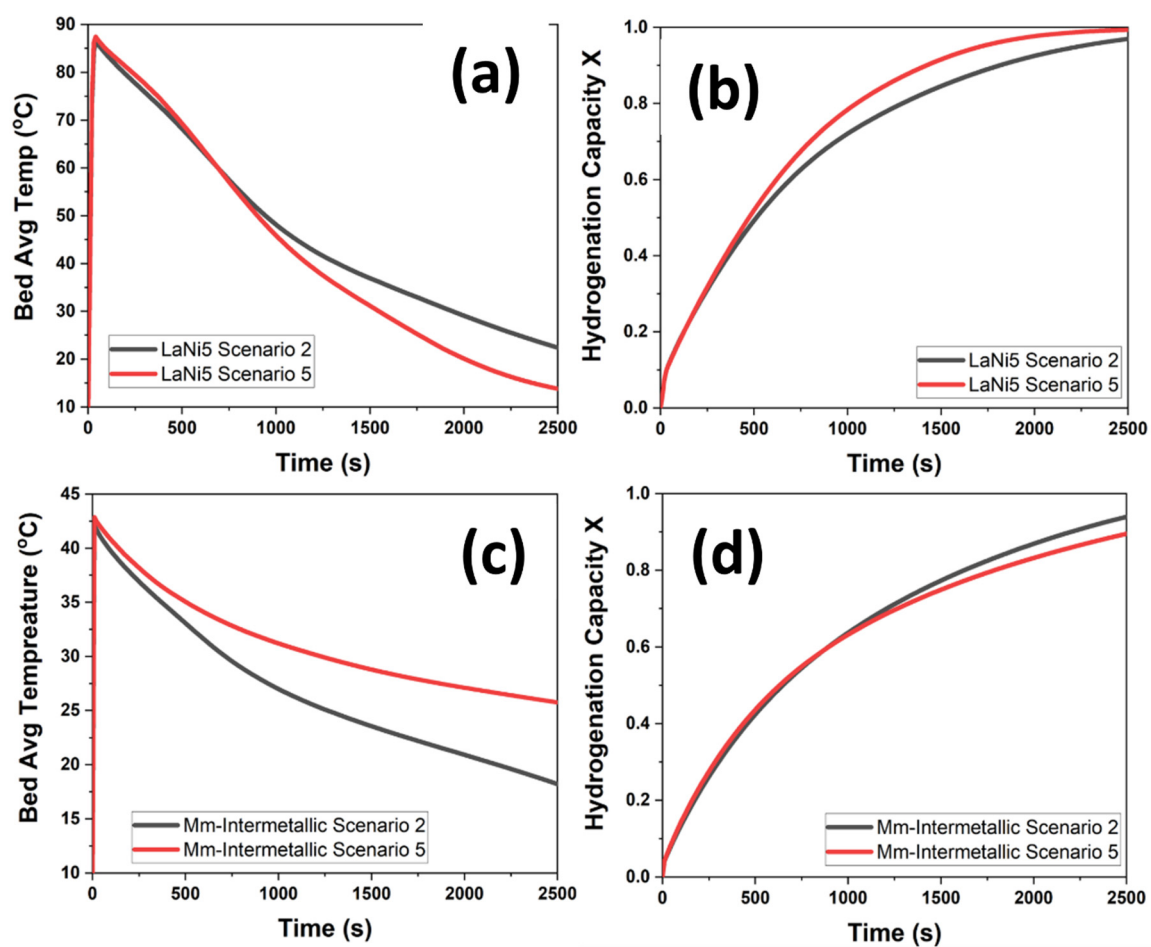

Figure S2. Temperature and hydrogenation behavior for LaNi<sub>5</sub> (S2a and S2b respectively) and for the AB<sub>5</sub> Mm-Intermetallic (S2c and S2d respectively)
